# Supplementary material for: Polycomb Group Protein YY1 Is an Essential Regulator of Hematopoietic Stem Cell Quiescence
Source: PubMed Central journal article supplement — Cell Rep. Author manuscript; Available in PMC 2018 Sep 17. (PMC6140794; doi:10.1016/j.celrep.2018.01.026), 2018-02-06
Supplement: NIHMS986873-supplement-1.pdf [file NIHMS986873-supplement-1.pdf]

**Cell Reports, Volume 22**

**Supplemental Information**

**Polycomb Group Protein YY1 Is  
an Essential Regulator  
of Hematopoietic Stem Cell Quiescence**

**Zhanping Lu, Courtney C. Hong, Guangyao Kong, Anna L.F.V. Assumpção, Irene M. Ong, Emery H. Bresnick, Jing Zhang, and Xuan Pan**

## Supplemental Experimental Procedures

### Colony formation assays

Primary bone marrow cells were plated in duplicate in Methocult M03434 complete medium (StemCell Technologies) at a density of  $3 \times 10^4$  cells per 35 mm plate. Plates were incubated for 10 to 12 days before counting BFU-E, CFU-GM, and CFU-GEMM colonies. To evaluate the colony-forming ability of purified LT-HSCs, single LT-HSCs were sorted directly into individual wells of 96-well plates containing Methocult M03434 medium and incubated for 2 weeks prior to the quantification.

### Bone marrow transplantations

Recipient C57BL/6 (CD45.1<sup>+</sup>) mice were lethally irradiated with 2 doses of 6 Gy each, delivered 4 hours apart, and transplanted with  $5 \times 10^5$  cells. For competitive bone marrow transplantation assay, bone marrow from *Mx1-cre* or *Yy1<sup>fl/fl</sup> Mx1-cre* mice (CD45.2<sup>+</sup>) were mixed with CD45.1<sup>+</sup> competitor cells at a 1:1 or 9:1 ratio and total  $2 \times 10^6$  BM cells were transplanted. At 4-week post-transplantation, recipient mice were treated with 5 doses of pI-pC to delete the endogenous *Yy1*. For secondary BMTs,  $10 \times 10^6$  BM cells from two donor mice were mixed and transplanted to lethally irradiated CD45.1<sup>+</sup> congenic recipients at 16-20 weeks post primary BMT.

### RNA sequencing and gene set enrichment analysis

Sequencing libraries were prepared by using Ovation RNA-Seq System V2 (NuGen) according to the manufacturer's specifications and were sequenced by an Illumina HiSeq 2000 at the University of Wisconsin Biotechnology Center Gene Expression Center. Sequencing reads were adapter and quality trimmed using the Skewer trimming program. Sequencing reads were mapped to the genome using Subjunc aligner from subread package (version 1.5.0-p1). Quantification of expression for each gene was calculated using the featureCounts tool from subread. Genes with at least one condition where 66.6% of the replicates have a count of  $> 0$  were used in downstream analysis. Gene set enrichment analysis (GSEA) was performed by calculating a ranked vector as  $\text{sign}(\text{foldChange}) * 1/\text{p-value}$ . GENE Symbols chip file and REACTOME (Croft et al., 2014; Fabregat et al., 2016) were used to run GSEA Ranked using GSEA version 2-2.2.2. GO analysis was performed using Gorilla (Eden et al., 2009). Analysis was done using R 3.3.1/Bioconductor 2.32.0 (Huber et al., 2015).

**A**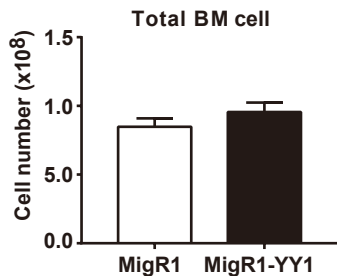**B**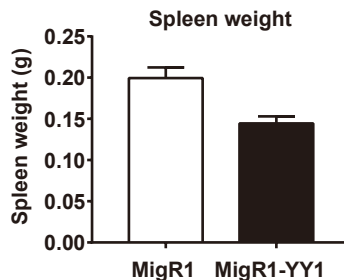**C**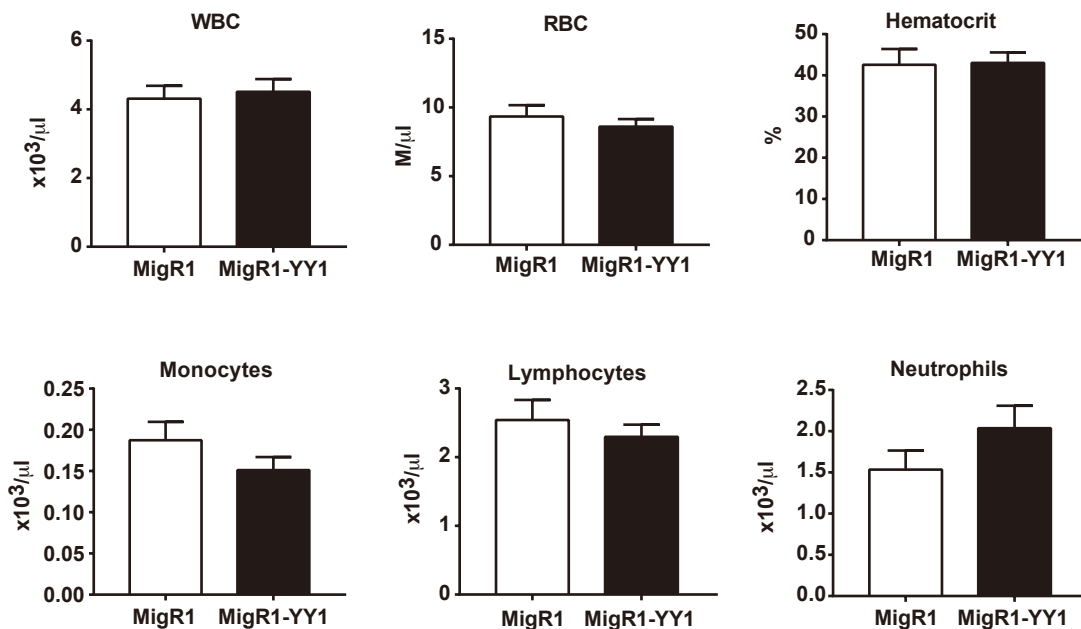

**Figure S1, Related to Figure 1.** (A) Total bone marrow count in mice with ectopic YY1 expression (MigR1-YY1) versus control (MigR1). (B) Spleen weight of mice with ectopic YY1 expression (MigR1-YY1) versus control (MigR1). (C) CBC of mice with ectopic YY1 expression (MigR1-YY1) versus control (MigR1).

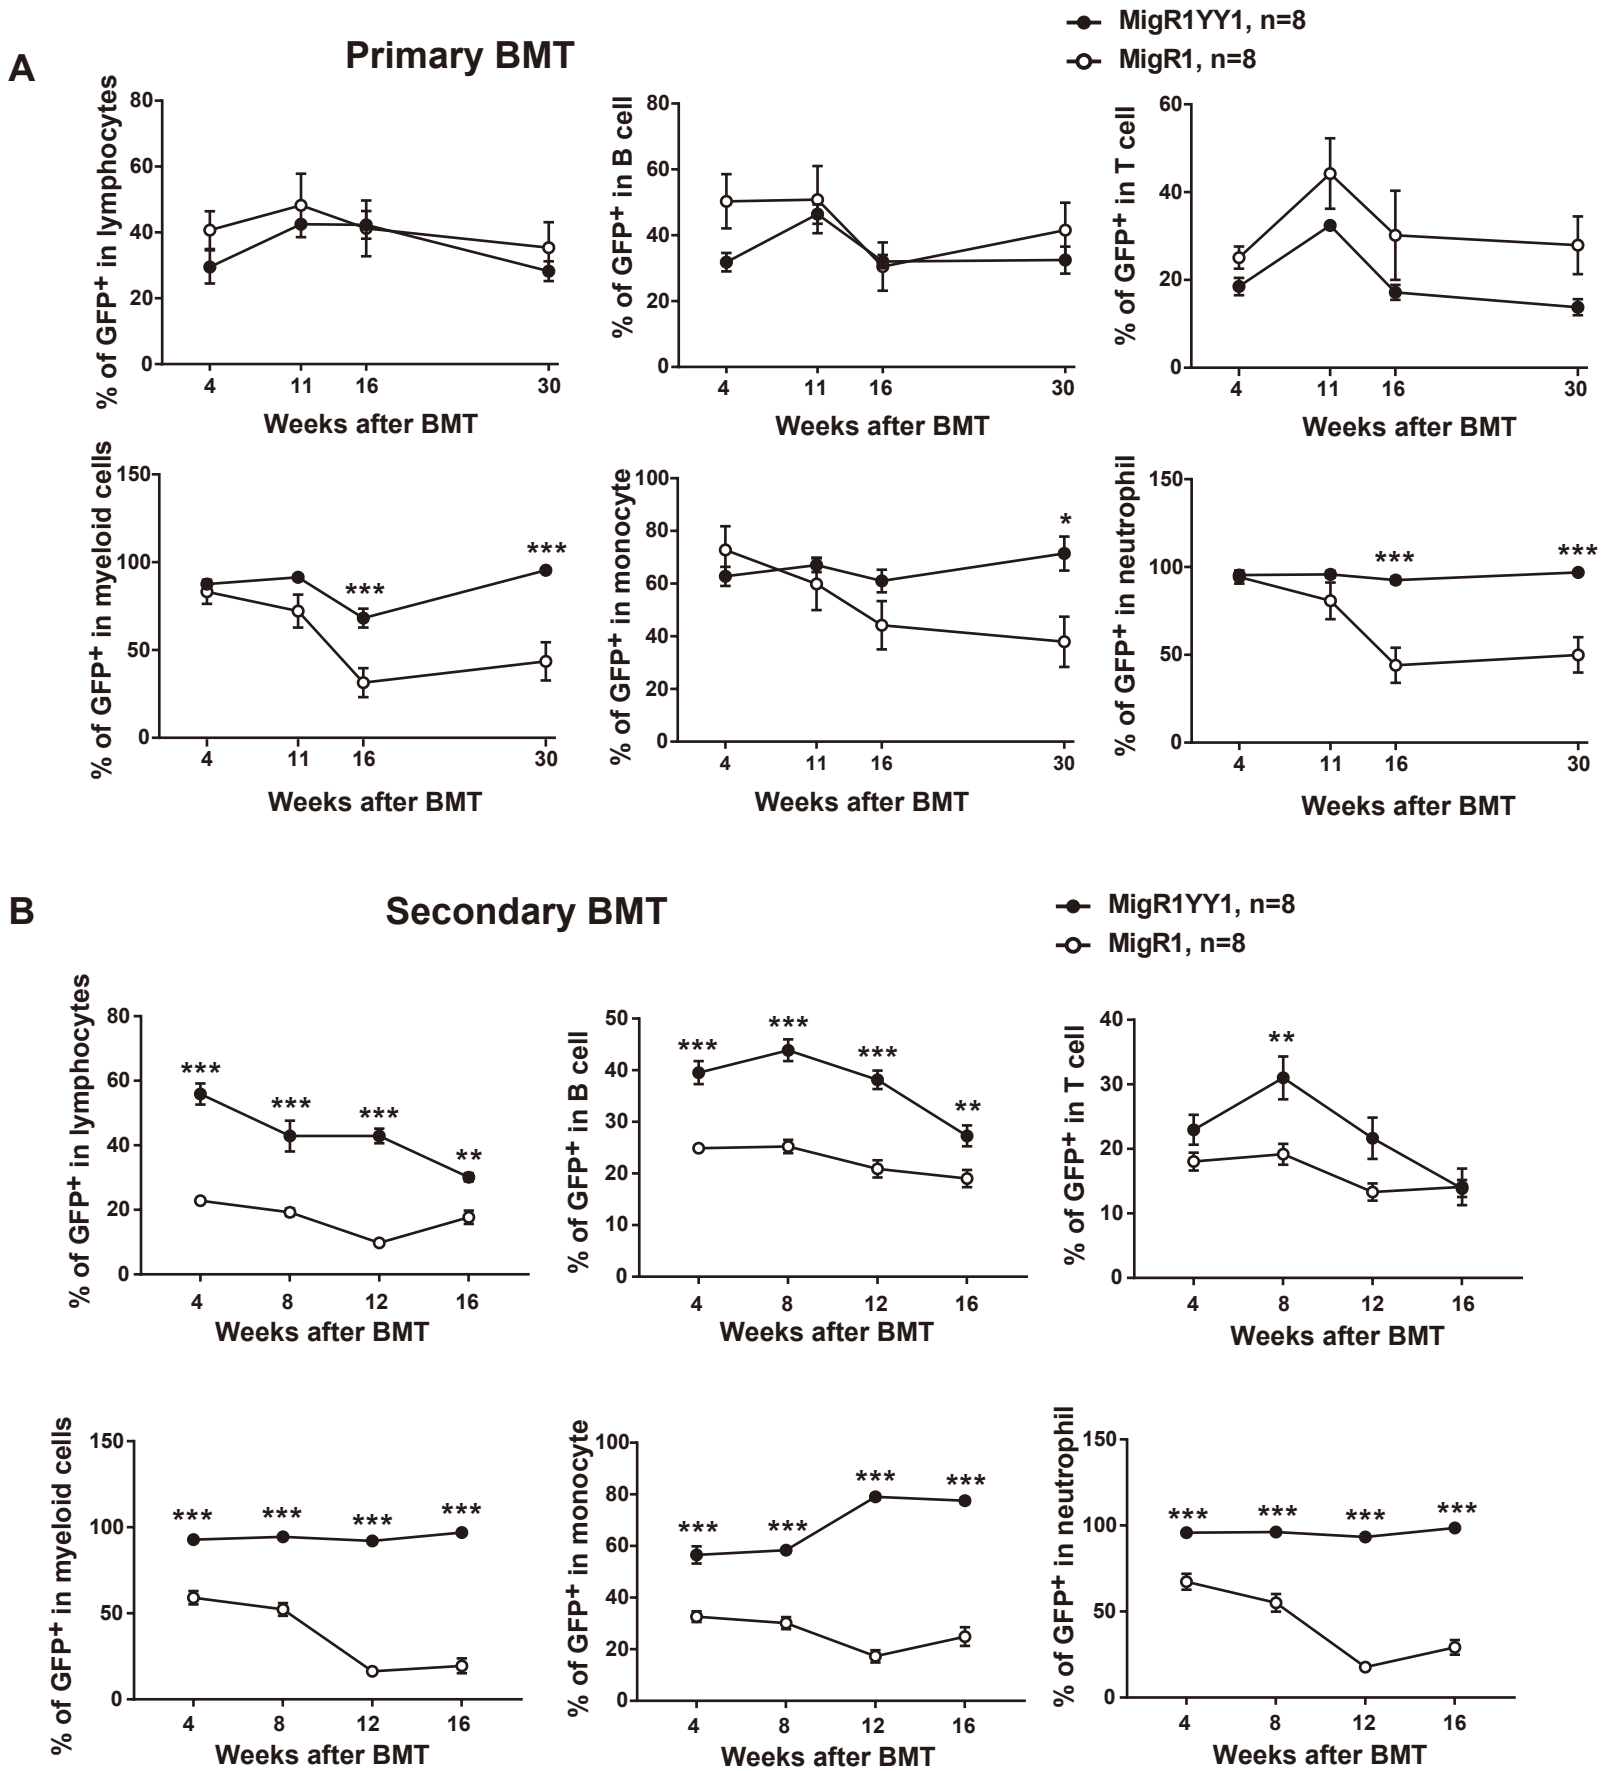

**Figure S2, Related to Figure 1.** (A) Primary BMT evaluations of donor-derived contribution in peripheral lymphocytes and myeloid cells of mice with ectopic YY1 expression (MigR1-YY1) versus control (MigR1). (B) Secondary BMT evaluations of donor-derived contribution in peripheral blood lymphocytes and myeloid cells of mice with ectopic YY1 expression (MigR1-YY1) versus control (MigR1). Graphs show means  $\pm$  SEM; \*P < 0.05, \*\*P < 0.01, \*\*\*P < 0.001.

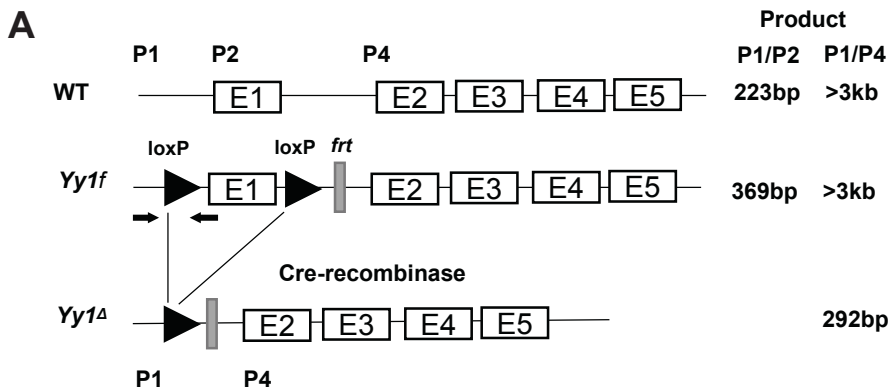

**B**

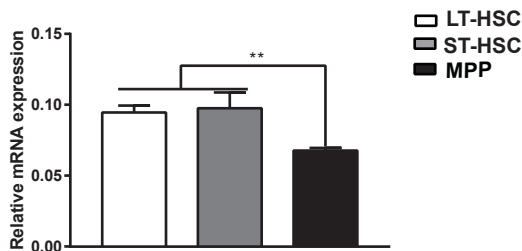

**Figure S3, Related to Figure 2.** (A) Schematic illustration of the *Yy1* locus. The conditional *Yy1* allele (*Yy1<sup>f</sup>*) was constructed by inserting a pair of loxP sites flanking exon 1 and the promoter region, which is excised in the presence of pI-pC induced Cre recombinase expression. The arrows indicate the location of the primers used for PCR detection of deletion efficiency. Primers 1 and 2 detect both *Yy1<sup>+</sup>* (223bp) and *Yy1<sup>f</sup>* (369bp). Primers 1 and 4 detect *Yy1<sup>Δ</sup>* (292bp). (B) YY1 mRNA expression in LT-HSC, ST-HSC and MPP. LT-HSC (Lin-Sca1+c-Kit+ CD48-CD150+), ST-HSC (Lin-Sca1+c-kit+CD48-CD150-) and MPP (Lin-Sca1+c-kit+ CD48+CD150-) were sorted from B6 mice and YY1 mRNA expressions were detected by qRT-PCR. Graphs show means  $\pm$  SEM; \*\**P* < 0.01.

## A Gating strategy:

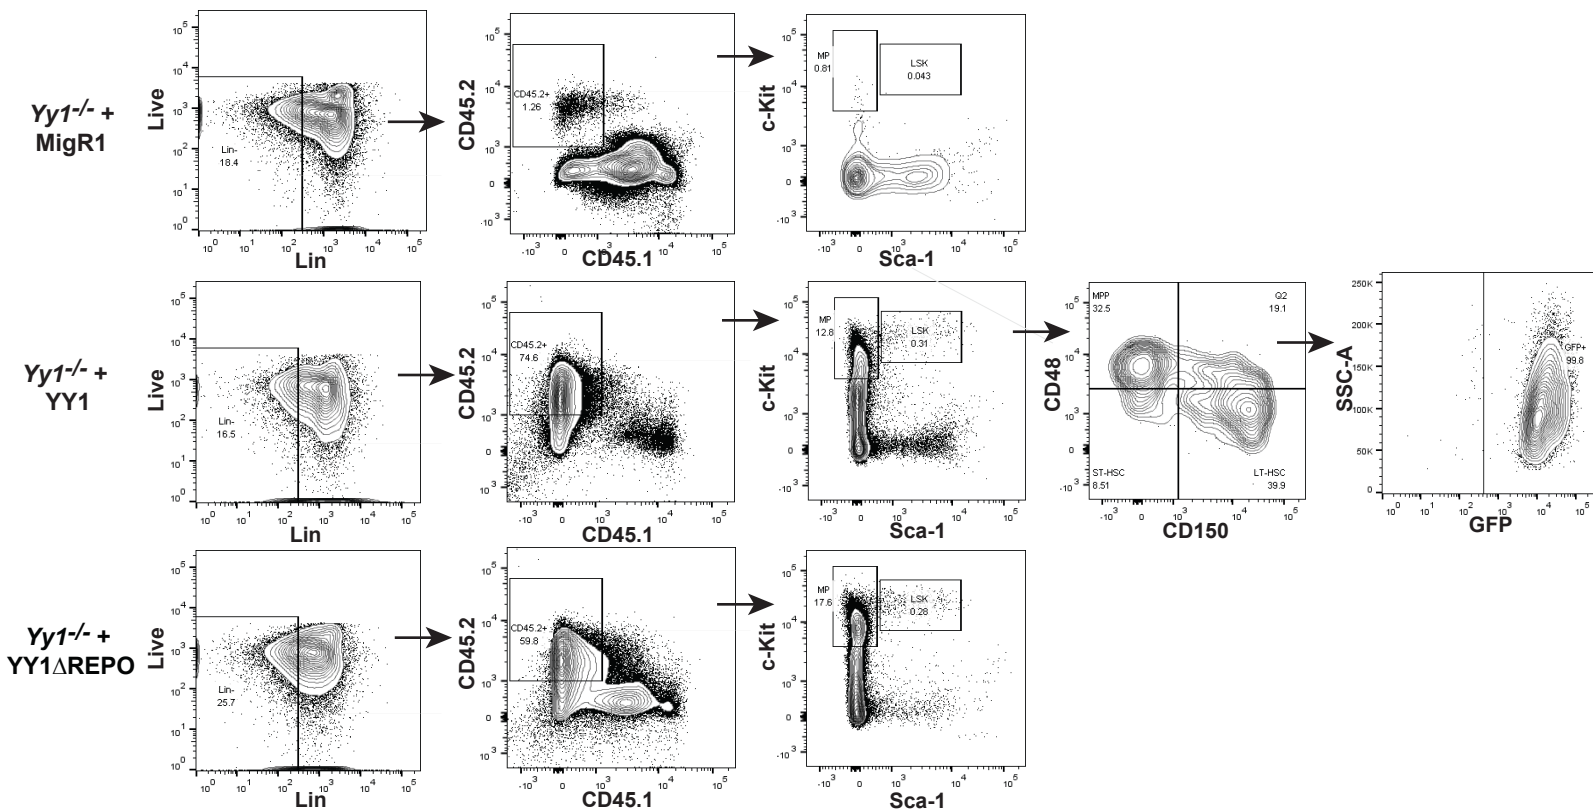

## B

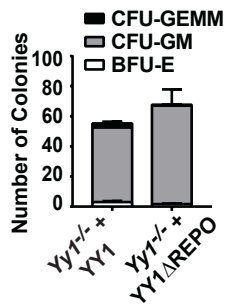

**Figure S4, Related to Figure 4.** (A) Gating Strategy of % GFP<sup>+</sup> in donor derived BM LT-HSC (Lin-Sca1+c-Kit<sup>+</sup> CD48-CD150<sup>+</sup>), ST-HSC (Lin-Sca1+c-kit<sup>+</sup>CD48-CD150<sup>-</sup>), MPP (Lin-Sca1+c-kit<sup>+</sup> CD48+CD150<sup>-</sup>), LSK (Lin-Sca1+c-kit<sup>+</sup>), and MP (Lin-Sca1-c-kit<sup>+</sup>). (B) Colony formation assay. Total bone marrow cells harvested from MigR1-FlagYY1 versus MigR1-FlagYY1 $\Delta$ REPO rescued primary BMT mice were plated in Methocult M03434 complete medium. CFU-GEMM, CFU-GM and BFU-E were counted 8 days afterwards. Graphs show means  $\pm$  SEM; \*P < 0.05, \*\*\*P < 0.001.

□ *Mx1-Cre*, n = 6    ■ *Yy1<sup>f/f</sup> Mx1-Cre*, n = 6

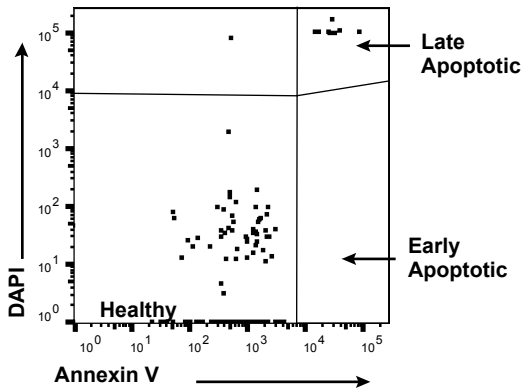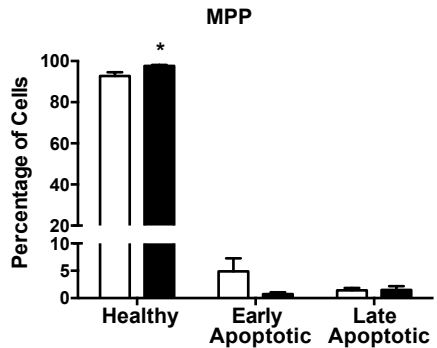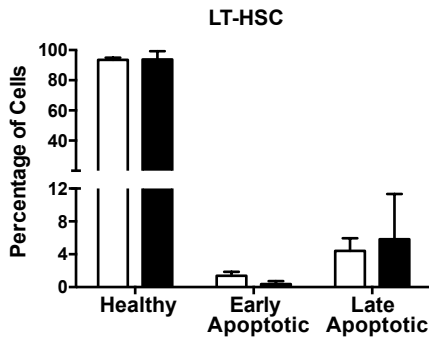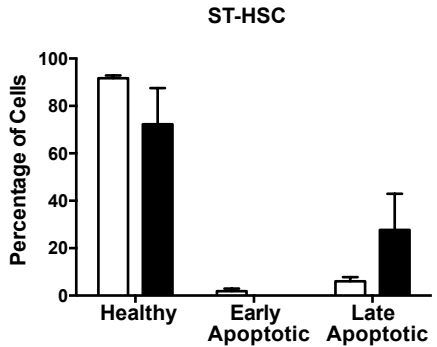

**Figure S5, Related to Figure 6.** *YY1* deficiency does not induce apoptosis in HSCs. Healthy (AnnexinV<sup>-</sup> DAPI<sup>-</sup>), early apoptotic (AnnexinV<sup>+</sup> DAPI<sup>-</sup>), and late apoptotic cells (AnnexinV<sup>+</sup> DAPI<sup>+</sup>) were gated by flow cytometry in bone marrow LT-HSC (Lin-Sca1+c-Kit+ CD48-CD150+), ST-HSC (Lin-Sca1+c-Kit+CD48-CD150-), and MPP (Lin-Sca1+c-Kit+ CD48+CD150-). The representative dot plot shows LT-HSC population. Graphs show means  $\pm$  SEM; \*P < 0.05.

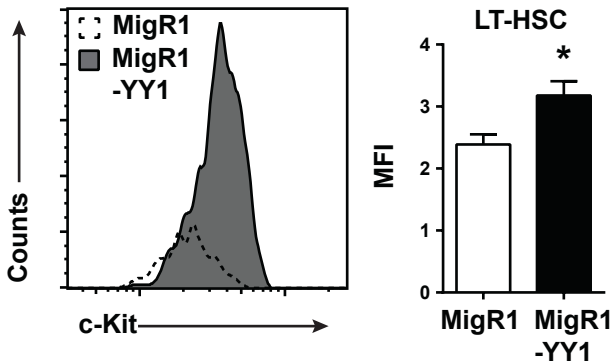

**Figure S6, Related to Figure 7.** Evaluation of c-Kit MFI in LT-HSC (Lin-Sca1+c-Kit+ CD48-CD150+) of mice with ectopic YY1 expression (MigR1-YY1) versus control (MigR1). Graphs show means  $\pm$  SEM; \*P < 0.05, \*\*P < 0.01, \*\*\*P < 0.001



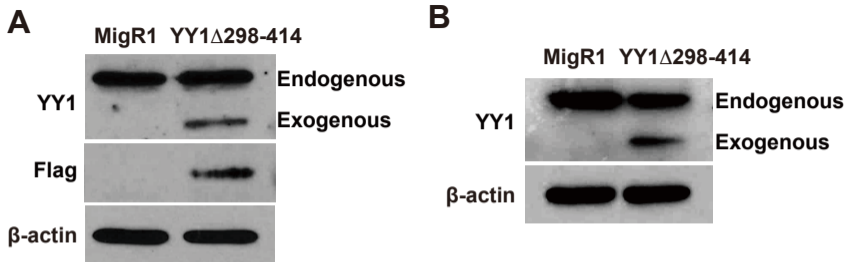

**Figure S7, Related to Figure 7.** YY1-Flag-YY1 $\Delta$ 298-414 was stably expressed in HPC7 cell and BMT mice. (A) Western blot of endogenous YY1 and exogenous Flag-YY1 $\Delta$ 298-414 expressions in HPC-7 cells infected with MigR1 or MigR1-Flag-YY1 $\Delta$ 298-414. (B) Western blot to detect endogenous YY1 and exogenous Flag-YY1 $\Delta$ 298-414 expressions in GFP<sup>+</sup> peripheral blood lymphocytes. Before pI-pC injections, GFP<sup>+</sup> peripheral blood were sorted from 4 mice transplanted with *Yy1*<sup>+/+</sup> + MigR1 or *Yy1*<sup>+/+</sup> + YY1 $\Delta$ 298-414 at 4 weeks post BMT.

**Table S1: Primer List, Related to Experimental Procedures.**

## ChIP qRT-PCR analysis

|        | Forward               | Reverse                 |
|--------|-----------------------|-------------------------|
| -114.5 | CTCCCTTCGATTCGCTCAAGA | CTGTTCTGAGATGCGGTTGC    |
| -4     | TCACAGATTGGTCTGCCTCTG | ATCCTCAAAGGAGTTGGGGT    |
| -0.06  | CTGGGAGGAGGGCTGGAG    | TGAGCTCCTCTCTCTGCTACA   |
| +53.6  | CTGCCTCTGAGCTGTGTTCTC | GAAACGCACTGGGGTTTTCAA   |
| +54    | CGAGTTGTCCCTGAAGGCAG  | GGCCATGTAGACTACTTCAGACC |

## qRT-PCR primers for mRNA expression

|              | Forward                  | Reverse                  |
|--------------|--------------------------|--------------------------|
| <i>Yyl</i>   | TCAGACCCTAAGCAACTGGCAGAA | TTGAGCTCTCAACGAACGCTTTGC |
| <i>Gata2</i> | GCAGAGAAGCAAGGCTCGC      | CAGTTGACACACTCCCGGC      |
| <i>Kit</i>   | AGTGGACGTACAGGTCCAGAA    | GCCTGGATTGCTCTTTGTTGT    |
| <i>Runx1</i> | TCACTGGCGCTGCAACAA       | TCTGCCGAGTAGTTTTCATCGTT  |
| <i>Smc1a</i> | TTACCGCCATCATTGGACCC     | GCTCCATGTATCAGGTCCCG     |
| <i>Smc3</i>  | ATCAACCAAATGGCAACGGC     | TGCAGGCGCTCTTCAATGTA     |
| <i>Smc4</i>  | CAGGTACAATGAGTGGCGGT     | GTCTCGTTCACTGTGCCGTA     |
| <i>Ncapg</i> | GACTCCTGTGAGGGATGGAAA    | TGTTTTGGCTCGTCTGGGTAA    |
| <i>Lcn2</i>  | TTTGTTCCAAGCTCCAGGGC     | ACTGGTTGTAGTCCGTGGTG     |
| <i>Socs2</i> | ACCGACTAACCTGCGGATTG     | GCAGAGTGGGTGCTGATGTA     |
| <i>P53</i>   | GGCGTAAACGCTTCGAGATG     | CAGTTTGGGCTTTCCTCCTTGA   |
| <i>Hlf</i>   | ATGACAAGTACTGGGCGAGG     | TGTTCTTGCATTTGCCAGC      |
| <i>Gapdh</i> | TCCTGCACCACCAACTGCTT     | GTCTTCTGGGTGGCAGTGAT     |

### Supplemental References:

- Croft, D., Mundo, A.F., Haw, R., Milacic, M., Weiser, J., Wu, G., Caudy, M., Garapati, P., Gillespie, M., Kamdar, M.R., *et al.* (2014). The Reactome pathway knowledgebase. *Nucleic acids research* *42*, D472-477.
- Eden, E., Navon, R., Steinfeld, I., Lipson, D., and Yakhini, Z. (2009). GOrilla: a tool for discovery and visualization of enriched GO terms in ranked gene lists. *BMC bioinformatics* *10*, 48.
- Fabregat, A., Sidiropoulos, K., Garapati, P., Gillespie, M., Hausmann, K., Haw, R., Jassal, B., Jupe, S., Korninger, F., McKay, S., *et al.* (2016). The Reactome pathway Knowledgebase. *Nucleic acids research* *44*, D481-487.
- Huber, W., Carey, V.J., Gentleman, R., Anders, S., Carlson, M., Carvalho, B.S., Bravo, H.C., Davis, S., Gatto, L., Girke, T., *et al.* (2015). Orchestrating high-throughput genomic analysis with Bioconductor. *Nat Methods* *12*, 115-121.
